# Supplementary material for: The transformation of a bimetal carboxylate-MOF into a phosphonate-based MOF as a multifunctional photocatalyst
Source: Royal Society of Chemistry journal article supplement (doi:10.1039/d5qi01658d), 2025-10-28
Supplement: d5qi01658d1.pdf [file d5qi01658d1.pdf]

## Transformation of Bimetal Carboxylate-MOF into Phosphonate-based MOF as Multifunctional Photocatalyst

*Aihui Cao*<sup>\*a</sup>, *Kang Li*<sup>b,c</sup>, *Xiao Xu*<sup>b,c</sup>, *Longtian Kang*<sup>b,c</sup> and *Min Zhang*<sup>\*d,e</sup>

<sup>a</sup> Key Laboratory of Catalysis Science and Technology of Chongqing Education Commission, Chongqing Key Laboratory of Catalysis and New Environmental Materials, College of Environmental and Resources, Chongqing Technology and Business University, Chongqing, 400067, China.

\*Corresponding author. E-mail: [caoihui137@ctbu.edu.cn](mailto:caoihui137@ctbu.edu.cn). (Aihui Cao)

<sup>b</sup> Key Laboratory of Design and Assembly of Functional Nanostructures, and Fujian Provincial Key Laboratory of Nanomaterials, Fujian Institute of Research on the Structure of Matter, Chinese Academy of Sciences, Fuzhou, Fujian 350002, P. R. China.

<sup>c</sup> Fujian Science & Technology Innovation Laboratory for Optoelectronic Information of China, Fuzhou, Fujian 350108, P. R. China.

<sup>d</sup> Institute of Engineering Thermophysics, School of Energy and Power Engineering, Chongqing University, Chongqing, 400044, P. R. China.

\*Corresponding author. E-mail: [zhangmin2022@cqu.edu.cn](mailto:zhangmin2022@cqu.edu.cn) (Min Zhang)

<sup>e</sup> Key Laboratory of Low-grade Energy Utilization Technologies and Systems, Chongqing University, Ministry of Education, Chongqing 400044, China.

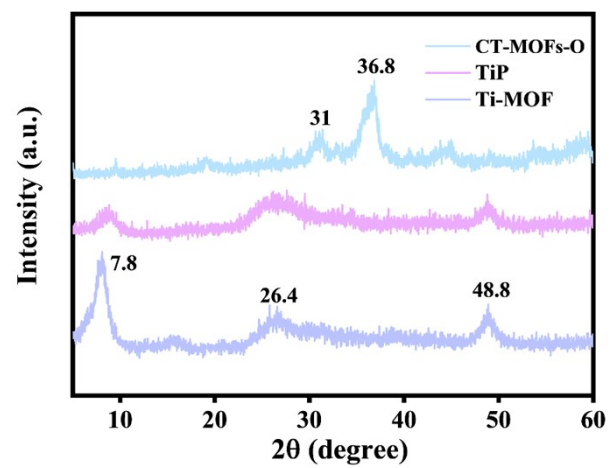

**Figure S1.** XRD pattern of Ti-MOF, TiP and CT-MOFs-O.

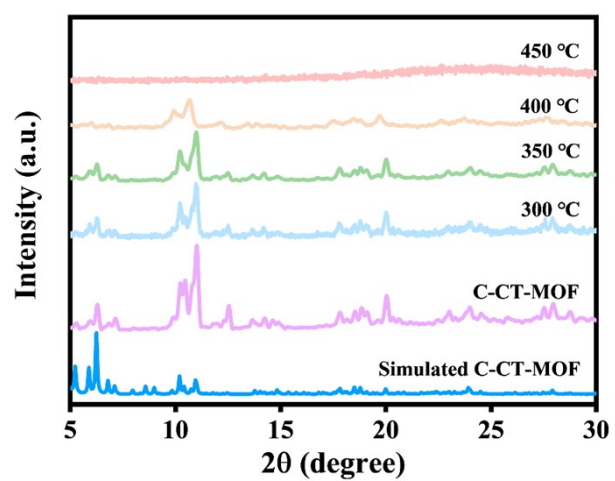

**Figure S2.** XRD pattern of C-CT-MOF with different temperature.

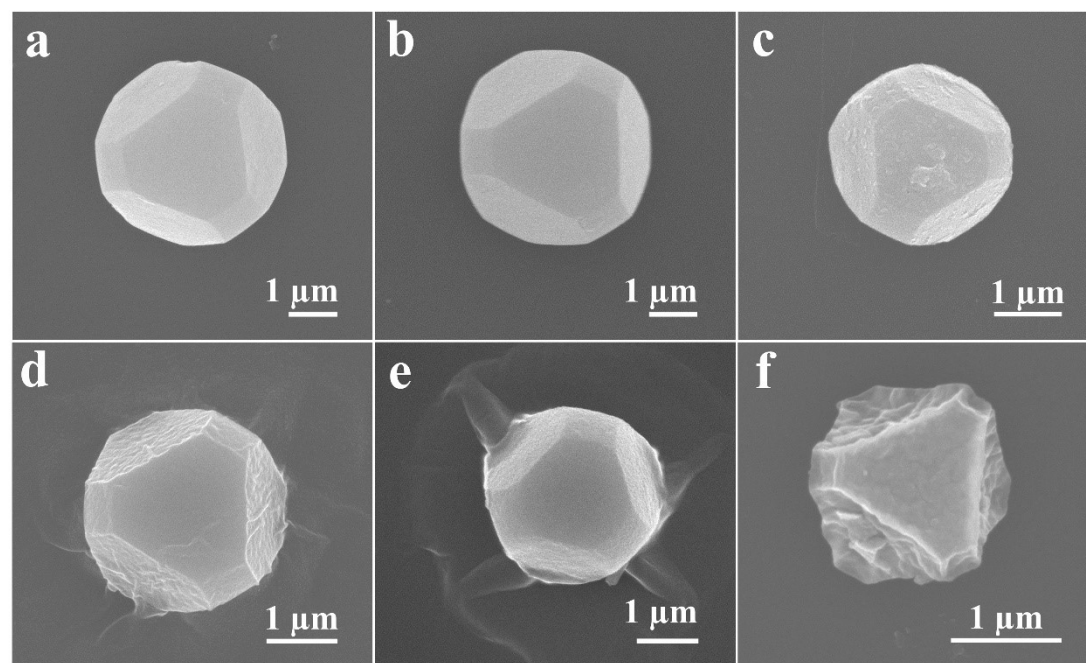

**Figure S3.** SEM images of (a) C-CT-MOF with different calcined temperature, (b) 300°C, (c) 350°C, (d) 400°C, (e) 450°C and (f) 350°C with O<sub>2</sub> atmosphere.

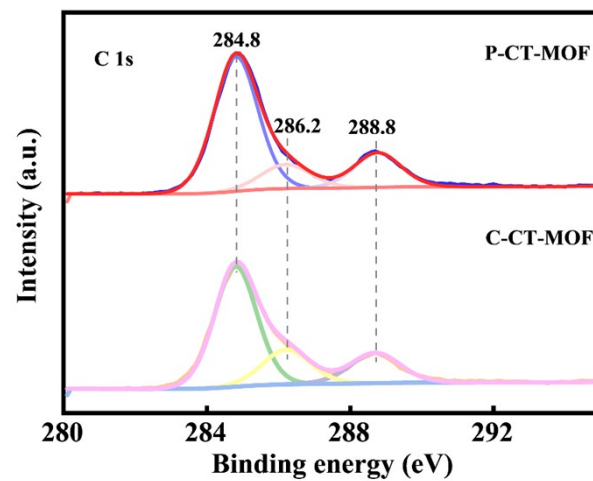

**Figure S4.** High resolution XPS spectra of C 1s of C-CT-MOF and P-CT-MOF.

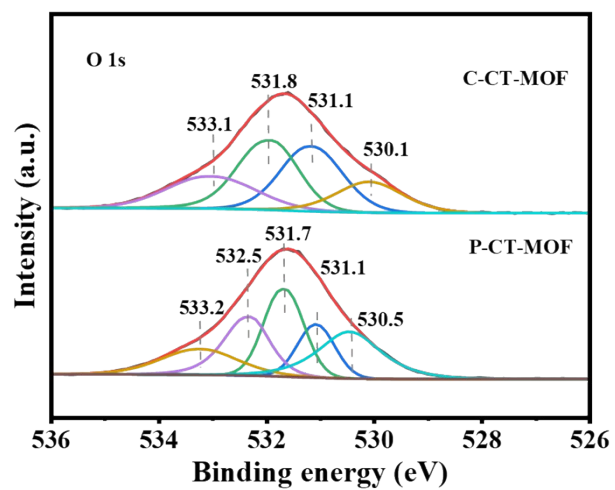

**Figure S5.** High resolution XPS spectra of O 1s of C-CT-MOF and P-CT-MOF.

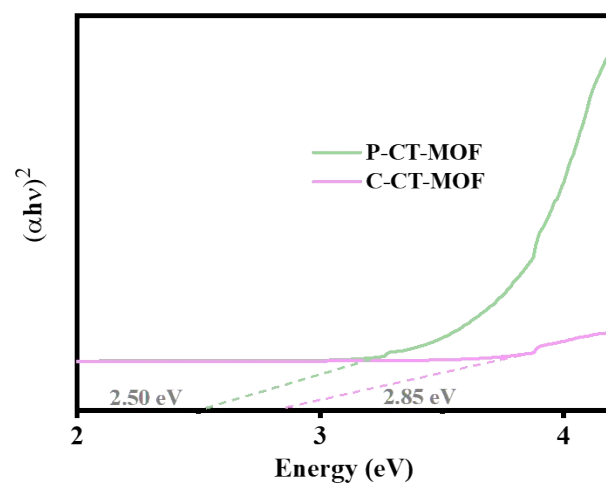

**Figure S6.** The band gap of C-CT-MOF and P-CT-MOF.

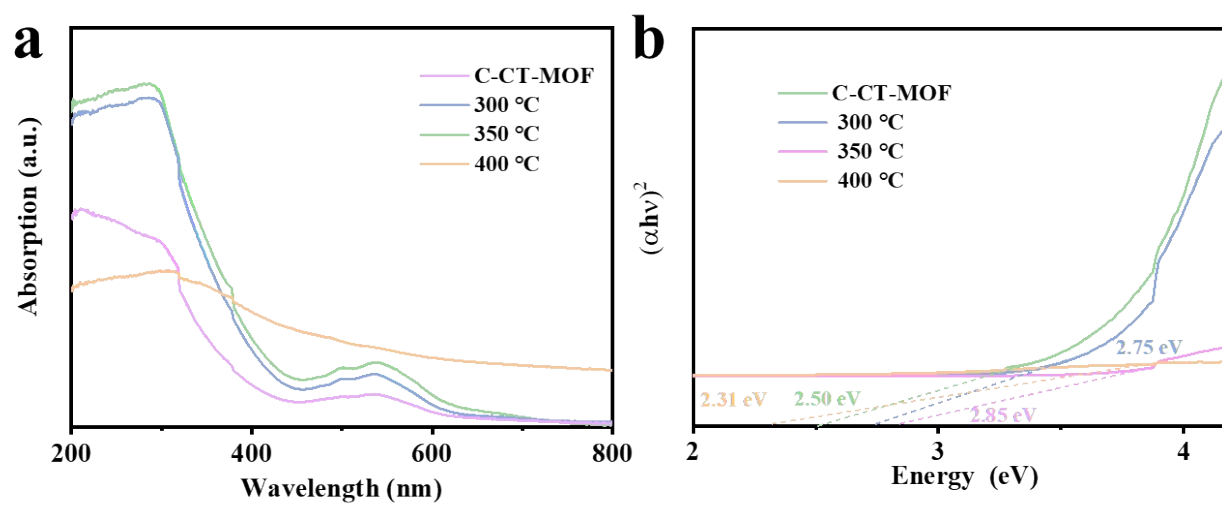

**Figure S7.** The UV-vis DRS and the band gap of C-CT-MOF and P-CT-MOF at different calcination temperature.

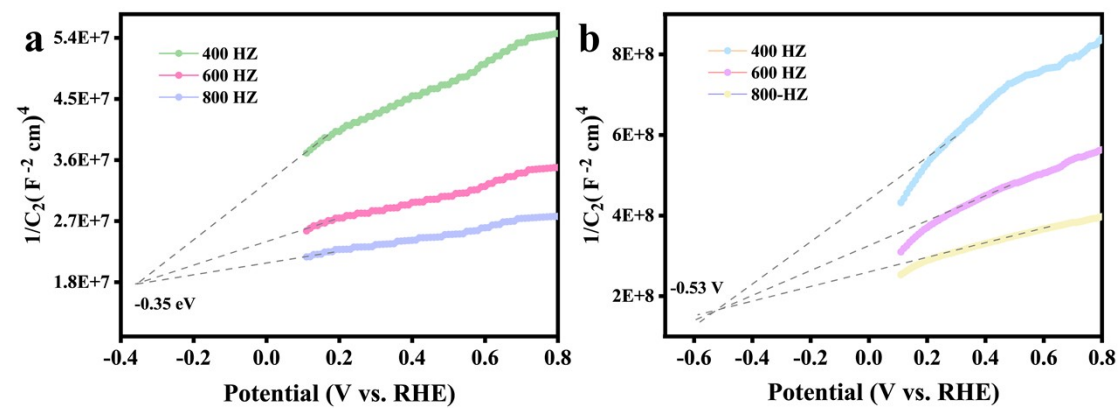

**Figure S8.** M-S curve plot of C-CT-MOF and P-CT-MOF.

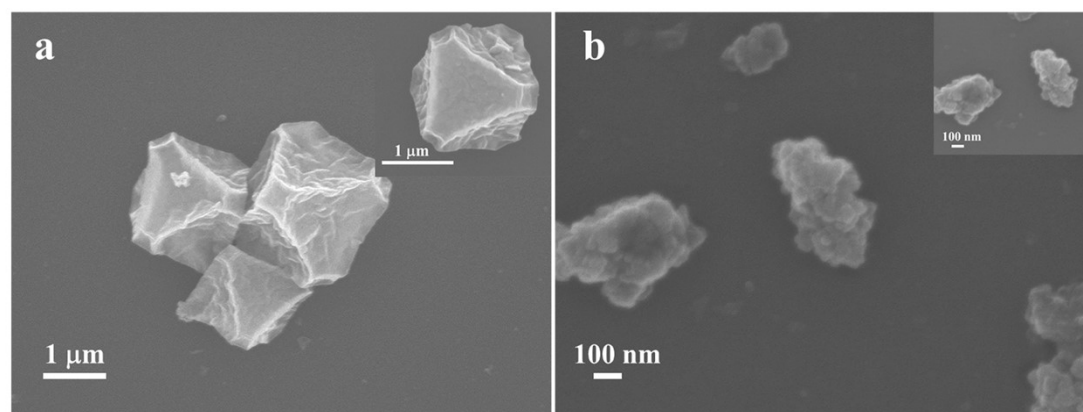

**Figure S9.** The SEM image of CT-MOFs-O and Ti-MOF.

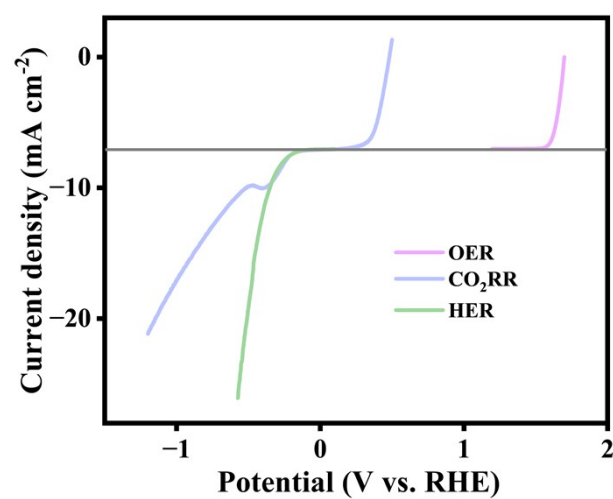

**Figure S10.** LSV curves in Electrocatalytic OER, HER and CO<sub>2</sub>RR of P-CT-MOF.

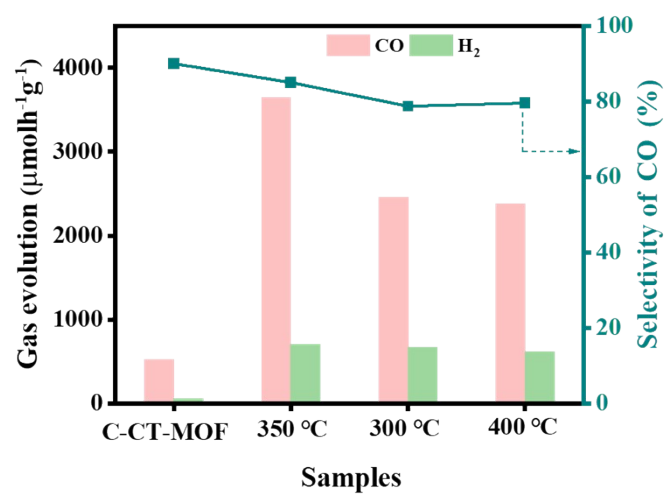

**Figure S11.** The Photocatalytic CO<sub>2</sub>RR performance of samples at different calcination temperature.

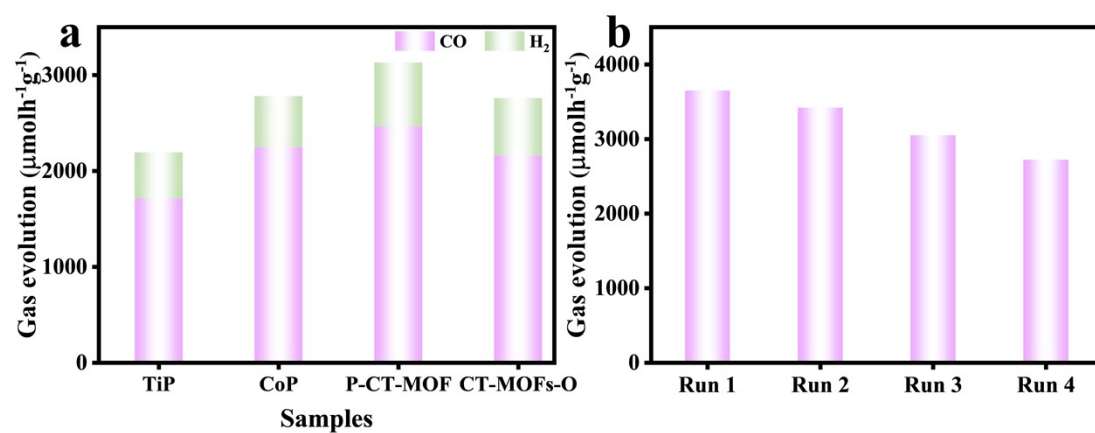

**Figure S12.** The Photocatalytic CO<sub>2</sub>RR performance of samples at (a) different

catalyst and (b) run stability.

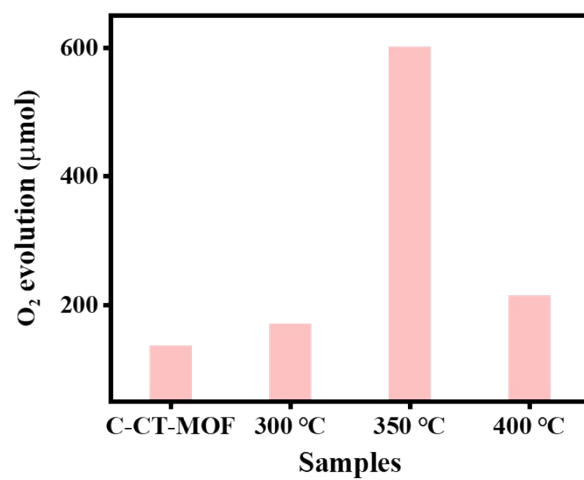

**Figure S13.** The Photocatalytic OER performance of samples at different calcination temperature.

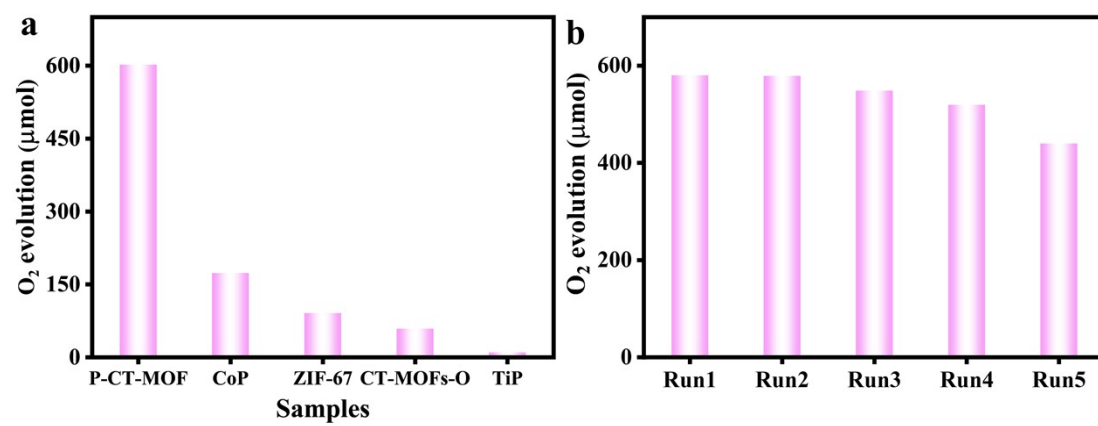

**Figure S14.** The photocatalytic OER performance of (a) different samples and (b) run stability.

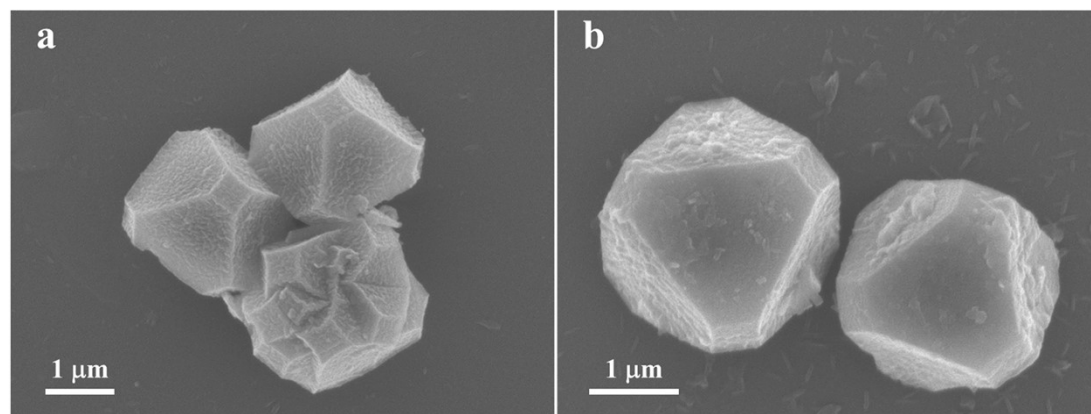

**Figure S15.** The SEM image of P-CT-MOF after photocatalytic CO<sub>2</sub>RR.

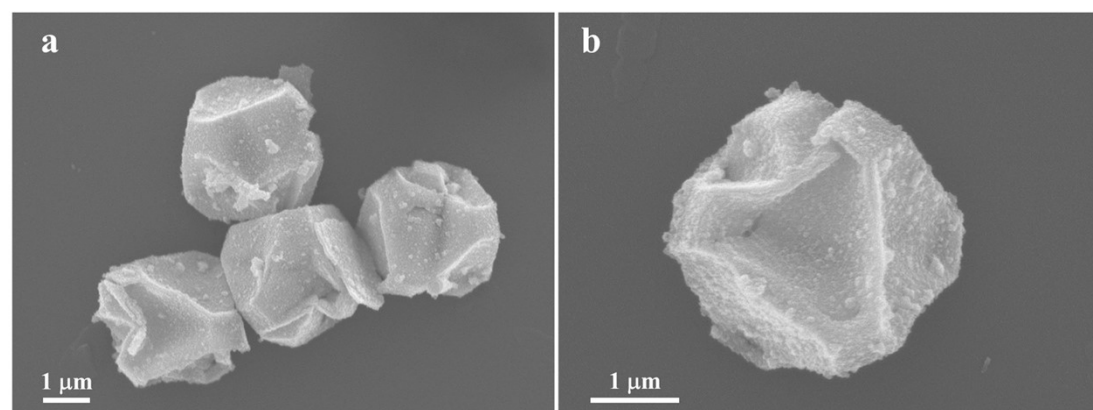

**Figure S16.** (a, b) The SEM image of P-CT-MOF after photocatalytic OER.

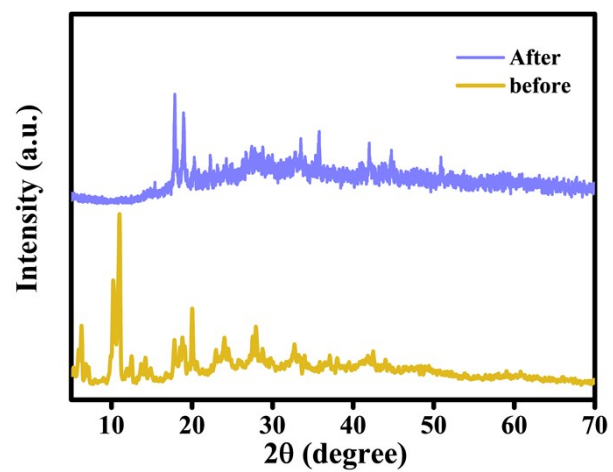

**Figure S17.** The XRD pattern of P-CT-MOF before and after photocatalytic CO<sub>2</sub>RR.

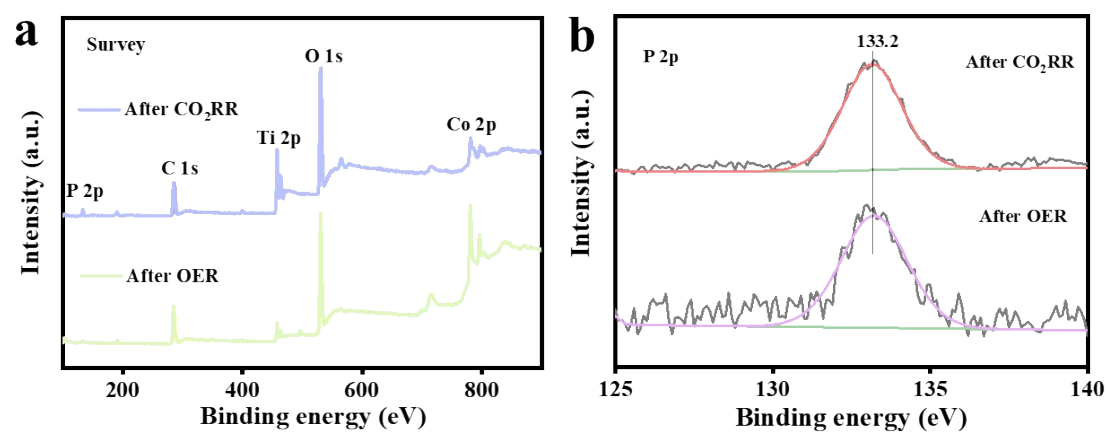

**Figure S18.** (a) The XPS full survey spectra and (b) P 2p spectra of after photocatalytic CO<sub>2</sub>RR and OER of P-CT-MOF samples.



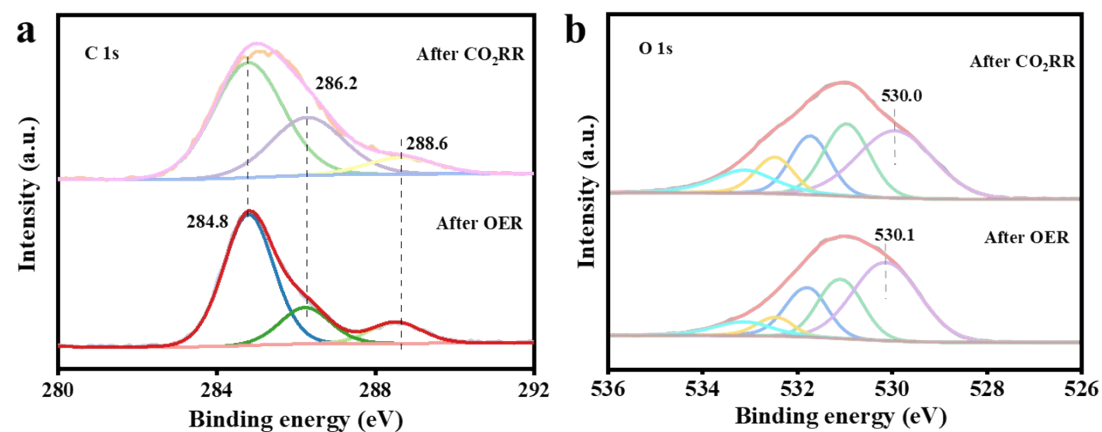

**Figure S19.** The XPS spectra of after photocatalytic CO<sub>2</sub>RR and OER of P-CT-MOF samples; (a) C 1s, (b) O 1s.

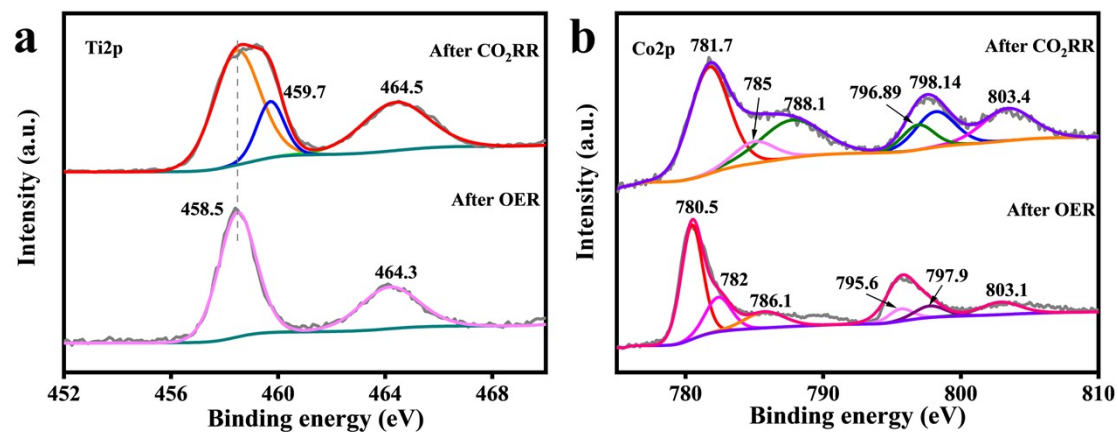

**Figure S20.** The SEM (a, b) and XPS (c, d) spectra after photocatalytic CO<sub>2</sub>RR and OER of P-CT-MOF samples (c) Ti 2p and (d) Co 2p.

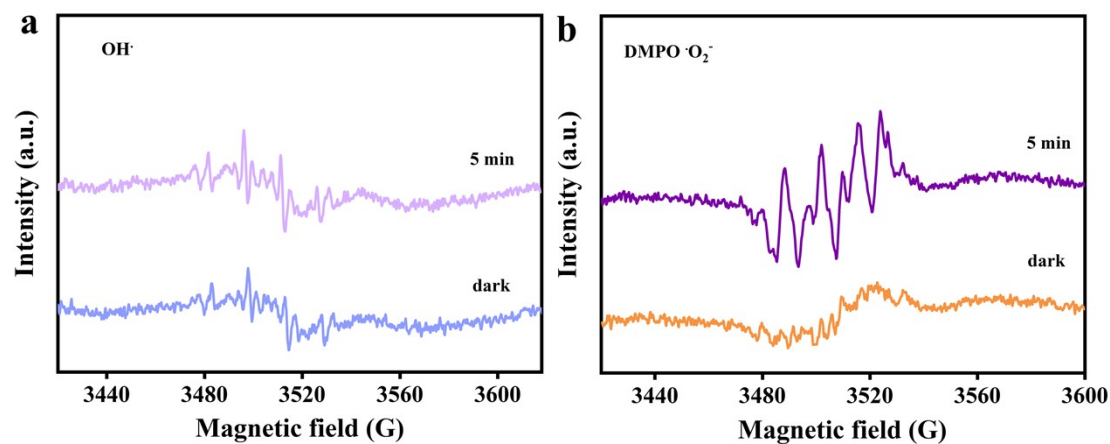

**Figure S21.** EPR of C-CT-MOF in aqueous solution and methanol solution.

**Table S1.** The composition of P-CT-MOF by ICP-OES before and after CO<sub>2</sub>RR

reaction.

| P-CT-MOF  | before     | after       |
|-----------|------------|-------------|
| Co:Ti (%) | 14.37:8.80 | 11.40: 6.90 |

**Table S2.** Comparison table of photocatalytic activity of semiconductor catalysts for CO<sub>2</sub>RR.

| Materials                             | $\lambda$                    | CO rate( $\mu\text{molh}^{-1}\text{g}^{-1}$ ) | AQY   | literature |
|---------------------------------------|------------------------------|-----------------------------------------------|-------|------------|
| P-CT-MOF                              | $\lambda \geq 420\text{ nm}$ | 3650.3                                        | no    | Our work   |
| NiMOF/g-C <sub>3</sub> N <sub>4</sub> | $\lambda \geq 420\text{ nm}$ | 54.5                                          | no    | [1]        |
| FeOOH/CdS                             | $\lambda \geq 420\text{ nm}$ | 12.55                                         | 4.6   | [2]        |
| Re(I)MOF                              | $\lambda \geq 420\text{ nm}$ | 1070                                          | 1.97  | [3]        |
| Au-NC@UiO-68NH <sub>4</sub>           | $\lambda \geq 400\text{ nm}$ | 57.6                                          | no    | [4]        |
| Re-UiO-67                             | $\lambda \geq 400\text{ nm}$ | 412.5                                         | no    | [5]        |
| MnMOF                                 | $\lambda \geq 420\text{ nm}$ | 21                                            | no    | [6]        |
| NH <sub>2</sub> -TiMOF                | $\lambda \geq 420\text{ nm}$ | 100.46                                        | no    | [7]        |
| MIL-101(Fe)                           | $\lambda \geq 400\text{ nm}$ | 11.5                                          | 0.943 | [8]        |
| UiO-67-Re                             | $\lambda \geq 420\text{ nm}$ | 60.6                                          | no    | [9]        |
| ZrMOF                                 | $\lambda \geq 420\text{ nm}$ | 1920                                          | no    | [10]       |
| TiO <sub>2</sub> /NiIP NSs            | $\lambda \geq 420\text{ nm}$ | 54.9 mmol g <sup>-1</sup> h <sup>-1</sup>     | no    | [11]       |
| InTCPP                                | $\lambda \geq 420\text{ nm}$ | 61.2                                          | no    | [12]       |
| CoIn-LDH/MOF                          | $\lambda \geq 420\text{ nm}$ | 2320                                          | no    | [13]       |
| Zr-NDI@Ru-tpy                         | $\lambda \geq 420\text{ nm}$ | 2449                                          | no    | [14]       |
| CoTiPa                                | $\lambda \geq 420\text{ nm}$ | 49.92                                         | 2.05  | [15]       |

**Literature**

[1] Zhao L, Zhao Z, Li Y, et al. The Synthesis of Interface-Modulated Ultrathin Ni(ii) MOF/g-C<sub>3</sub>N<sub>4</sub> Heterojunctions as Efficient Photocatalysts for CO<sub>2</sub> Reduction[J]. Nanoscale, 2020, 12: 10010-

10018.

- [2] Li L, Guo C, Ning J, et al. Oxygen-Vacancy-Assisted Construction of FeOOH/CdS Heterostructure as an Efficient Bifunctional Photocatalyst for CO<sub>2</sub> Conversion and Water Oxidation[J]. Applied Catalysis B: Environmental, 2021, 293:120203.
- [3] Choi S, Jung W, Park K, et al. Rapid Exciton Migration and Amplified Funneling Effects of Multi-Porphyrin Arrays in a Re(I)/Porphyrinic MOF Hybrid for Photocatalytic CO<sub>2</sub> Reduction[J]. ACS Applied Materials Interfaces, 2021, 13: 2710-2722.
- [4] Jiang Y, Yu Y, Zhang X, et al. N-Heterocyclic Carbene-Stabilized Ultrasmall Gold Nanoclusters in a Metal-Organic Framework for Photocatalytic CO<sub>2</sub> Reduction[J]. Angewandte Chemie International Edition, 2021, 60: 17388-17393.
- [5] Gao X, Guo B, Guo C, et al. Zirconium-Based Metal-Organic Framework for Efficient Photocatalytic Reduction of CO<sub>2</sub> to CO: The Influence of Doped Metal Ions[J]. ACS Applied Materials Interfaces, 2020, 12: 24059-24065.
- [6] Qin J, Xu P, Huang Y, et al. High Loading of Mn(ii)-Metalated Porphyrin in a MOF for Photocatalytic CO<sub>2</sub> Reduction in Gas-Solid Conditions[J]. Chemical communication, 2021, 57: 8468-8471.
- [7] Cheng X, Zhang X, Dao X, et al. High-Index Facets Exposed on Metal–Organic Framework for Boosting Photocatalytic Carbon Dioxide Reduction[J]. Chemical Engineering Journal, 2022, 431: 134125.
- [8] Dao X, Guo J, Zhang X, et al. Structure-Dependent Iron-Based Metal–Organic Frameworks for Selective CO<sub>2</sub>-to-CH<sub>4</sub> Photocatalytic Reduction[J]. Journal of Materials Chemistry A, 2020, 8: 25850-25856.
- [9] Nakajima T, Tamaki Y, Ueno K, et al. Photocatalytic Reduction of Low Concentration of CO<sub>2</sub>[J]. Journal of the American Chemical Society, 2016, 138: 13818-13821.
- [10] Li M, Li C, Shi Y, Zhang H, Fan Z, Liu Y, Zhang J, Pang J. and Bu X, et al. Embedding Metallosalen Active Sites in Zr-MOF for Enhanced Selective Syngas Production from CO<sub>2</sub> Photoreduction [J]. Angewandte Chemie International Edition, 2025, 137, e202510810.
- [11] Wu C, Song K, Zhang X, Tan B, Liao R, Liu Z, Zhu H, Wang J, et al. Highly Efficient Photocatalytic CO<sub>2</sub>-to-CO on Ni-Based Cationic Polymer with TiO<sub>2</sub>-Assisted Exfoliation and Stabilization[J]. Angewandte Chemie International Edition, 2025, 64, e202423200.

- [12] Cai Z, Liu H, Dai J, Li B, Yang L, Wang J, Zhu H, et al. Sunlight-driven simultaneous CO<sub>2</sub> reduction and water oxidation using indium-organic framework heterostructures[J]. Nature Communications, 2025, 16, 2601.
- [13] Feng J, Li W, Chen T, Zeng Z, Tian M, Ji W, Guo Y, Min S, Liu X, et al. Co–In Bimetallic Hydroxide Nanosheet Arrays with Coexisting Hydroxyl and Metal Vacancies Anchored on Rod-Like MOF Template for Enhanced Photocatalytic CO<sub>2</sub> Reduction[J]. Advanced Science, 12, e2411673.
- [14] Jana A, Maity A, Adalder A, Saha S, Bhunia A, et al. A molecularly engineered MOF photocatalyst for CO production from visible light-driven CO<sub>2</sub> reduction[J]. Nanoscale, 17, 12235-12244.
- [15] Chen Y, Hsieh N, Hsu, S W, et al. Plasmonic Nanocrystal-MOF Nanocomposites as Highly Active Photocatalysts and Highly Sensitive Sensors for CO<sub>2</sub> Reduction over a Wide Range of Solar Wavelengths[J]. Small Methods, 2025,19, e2500081.
